# Supplementary material for: Monitoring Intertidal Habitats for Effects from Biosolids Applications onto an Adjacent Forestry Plantation
Source: MDPI journal article supplement (doi:10.3390/su151612279), 2023-08-11

## Supplementary Information

**Table S1:** Grain size, nutrient, chemical and microbiological testing methods used in the study.

| Test                                                  | Method                                                                                                                                            | Reference | Limit of detection         |
|-------------------------------------------------------|---------------------------------------------------------------------------------------------------------------------------------------------------|-----------|----------------------------|
| Total nitrogen                                        | Catalytic combustion (900°C, O <sub>2</sub> ), separation, thermal conductivity detector [Elementar Analyser].                                    | [35]      | 0.02 g/100 g dry weight    |
| Dry matter for grainsize samples (sieved)             | Drying for 16 h at 103°C, gravimetry (free water removed before analysis). Hill Laboratories.                                                     | [36]      | 0.10 g/100 g               |
| Grain size profile (fraction ≥ 2 mm)                  | Wet sieving with dispersant, as received, 2.00 mm sieve, gravimetry.                                                                              | [36]      | 0.1 g/100 g dry weight     |
| Fraction < 2 mm, ≥ 63 µm                              | Wet sieving using dispersant, as received, 2.00 mm and 63 µm sieves, gravimetry (calculation by difference).                                      | [36]      | 0.1 g/100 g dry weight     |
| Fraction < 63 µm                                      | Wet sieving with dispersant, as received, 63 µm sieve, gravimetry (calculation by difference).                                                    | [36]      | 0.1 g/100 g dry weight     |
|                                                       |                                                                                                                                                   |           |                            |
| Arsenic/trace metals (As, Cd, Cr, Cu, Ni, Pb, Zn, Hg) | Dried sample, <2 mm fraction. Nitric/Hydrochloric acid digestion, ICP-MS, trace level. Hill Laboratories. APHA 3125 B 23 1 <sup>st</sup> Edition. | [37]      | 0.010–0.4 mg/kg dry weight |
| <i>E. coli</i>                                        | APHA 5 <sup>th</sup> Edition, Chapter 9, 2015.                                                                                                    | [38]      | <30 MPN/100 g              |
| Presumptive enterococci                               | APHA 4 <sup>th</sup> Edition, 2001.                                                                                                               | [39]      | <30 MPN/100 g              |

**Figure S1:** Total daily volume of biosolids applied to forestry blocks on Moturoa / Rabbit Island after the baseline survey, 1997–2019.

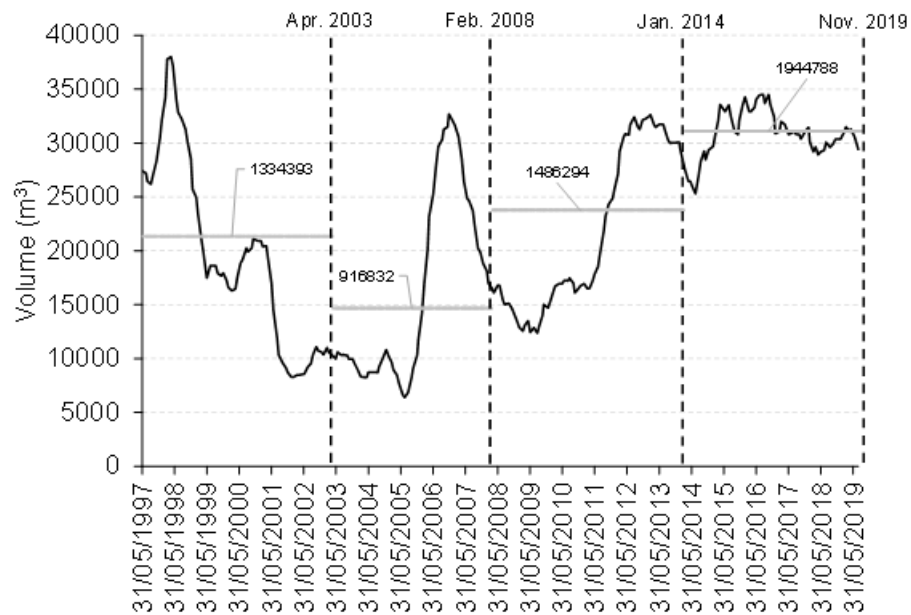

**Figure S2:** Scatterplot of concentrations of total nitrogen in sediment samples as a function of distance from the nearest Moturoa / Rabbit Island biosolids application area in the 2019 survey.

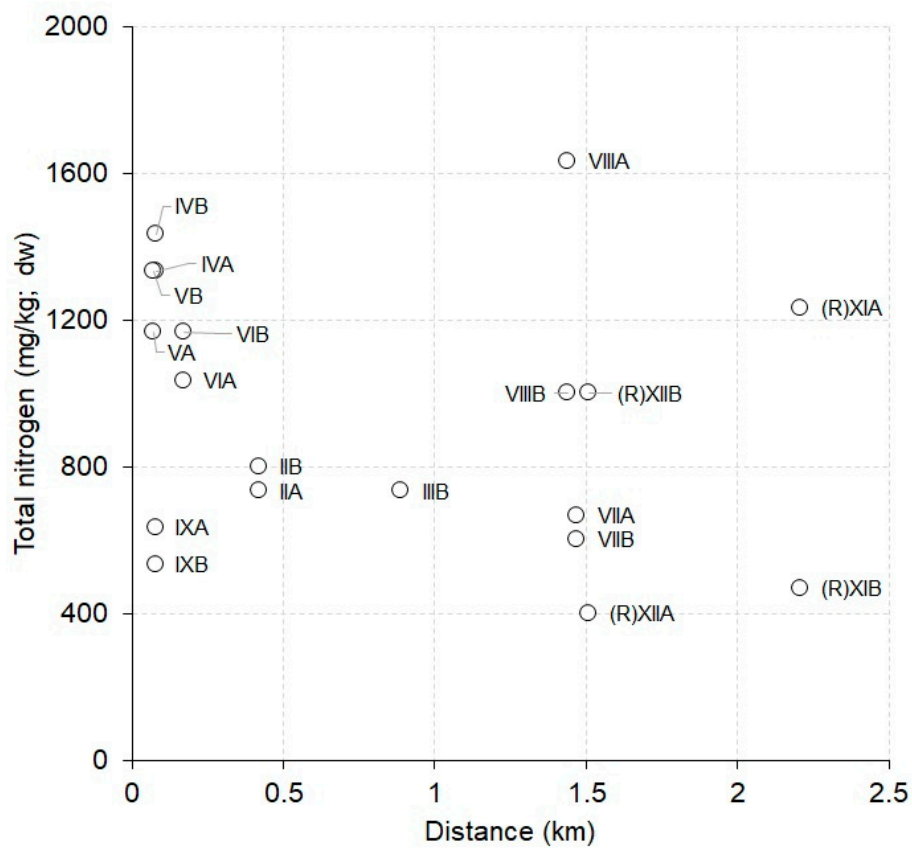

Supplement: s1 [file s1]
