# Supplementary material for: Monitoring Intertidal Habitats for Effects from Biosolids Applications onto an Adjacent Forestry Plantation
Source: MDPI journal article supplement (doi:10.3390/su151612279), 2023-08-11
Supplement: s1 [file s1]

Archive with 1 entries (1 files):
- sustainability-2411114-supplementary.pdf
